# Supplementary material
Source: publisher figshare collection journal article supplement (https://tandf.figshare.com/articles/dataset/_/3179833)
Supplement: Supplementary file 1 [file 1]

Table A1: Traffic situations and main performance requirements.

| situation | description | main performance requirements |
| --- | --- | --- |
| sharp bend | sharp bend on a rural road | lateral vehicle control |
| broken-down car | broken-down car on the driver’s lane; choosing a gap for overtaking while traffic is upcoming | longitudinal / lateral control |
| curvy forest road | driving through a winding forest road with upcoming traffic for 2.7 km. Overall 19 bends, mean curvature radius = 380,52 m (SD =  279,11 m) | lateral vehicle control |
| construction site | driving through a construction site | longitudinal / lateral control |
| car-following | following a leading vehicle for 3 km; the leading vehicle has a predefined speed profile varying between 80 and 100 km/h | longitudinal control |
| traffic light | entering an urban area. A traffic light switches to red when approaching | response time |
| pedestrian crosses (1) | a pedestrian appears suddenly behind parked cars and crosses the road; immediate braking is necessary | response time |
| slow vehicle ahead | following a slow car ahead which suddenly brakes | response time |
| pedestrian crosses (2) | again a pedestrian appears suddenly behind parked cars and crosses the road; immediate braking is necessary | response time |
