# Supplementary material
Source: publisher figshare collection journal article supplement (https://tandf.figshare.com/articles/dataset/_/3179833)
Supplement: Supplementary file 1 [file 1]

1    **APPENDIX**

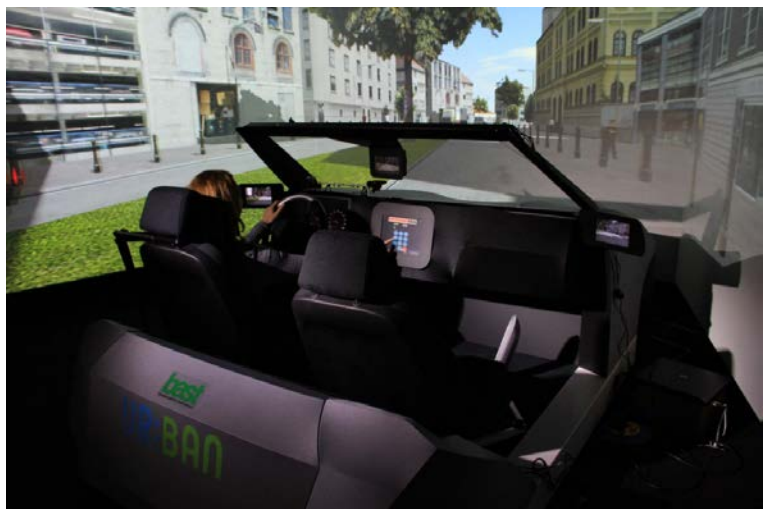

2  
3    Fig. A1. BAST driving simulator. The driver's cabin, the touch display with the secondary  
4    task, and the representation of traffic and environment can be seen.

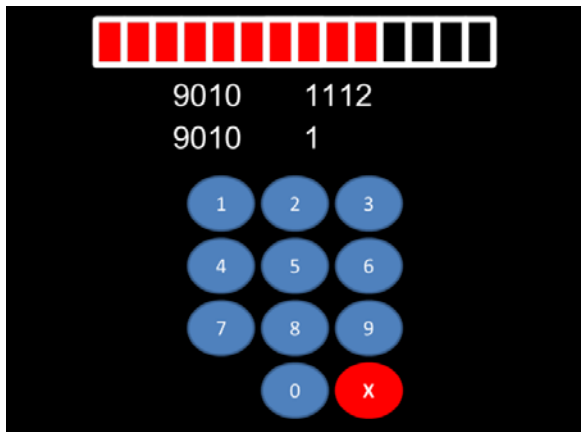

6  
7    Fig. A2: The secondary task used in this study. On the top, the progress bar for the remaining  
8    time (only in the block design group) is displayed, beneath the given and entered number  
9    sequences, on the bottom the numeric keypad.

11 Table A1: Traffic situations and main performance requirements.

| situation                 | description                                                                                                                                         | main performance requirements     |
|---------------------------|-----------------------------------------------------------------------------------------------------------------------------------------------------|-----------------------------------|
| sharp bend                | sharp bend on a rural road                                                                                                                          | lateral vehicle control           |
| broken-down car           | broken-down car on the driver's lane;<br>choosing a gap for overtaking while traffic<br>is upcoming                                                 | longitudinal / lateral<br>control |
| curvy forest road         | driving through a winding forest road with<br>upcoming traffic for 2.7 km. Overall 19<br>bends, mean curvature radius = 380,52 m<br>(SD = 279,11 m) | lateral vehicle control           |
| construction site         | driving through a construction site                                                                                                                 | longitudinal / lateral<br>control |
| car-following             | following a leading vehicle for 3 km; the<br>leading vehicle has a predefined speed<br>profile varying between 80 and 100 km/h                      | longitudinal control              |
| traffic light             | entering an urban area. A traffic light<br>switches to red when approaching                                                                         | response time                     |
| pedestrian crosses<br>(1) | a pedestrian appears suddenly behind<br>parked cars and crosses the road;<br>immediate braking is necessary                                         | response time                     |

slow vehicle ahead    following a slow car ahead which suddenly    response time  
brakes

pedestrian crosses    again a pedestrian appears suddenly behind    response time  
(2)    parked cars and crosses the road;  
immediate braking is necessary

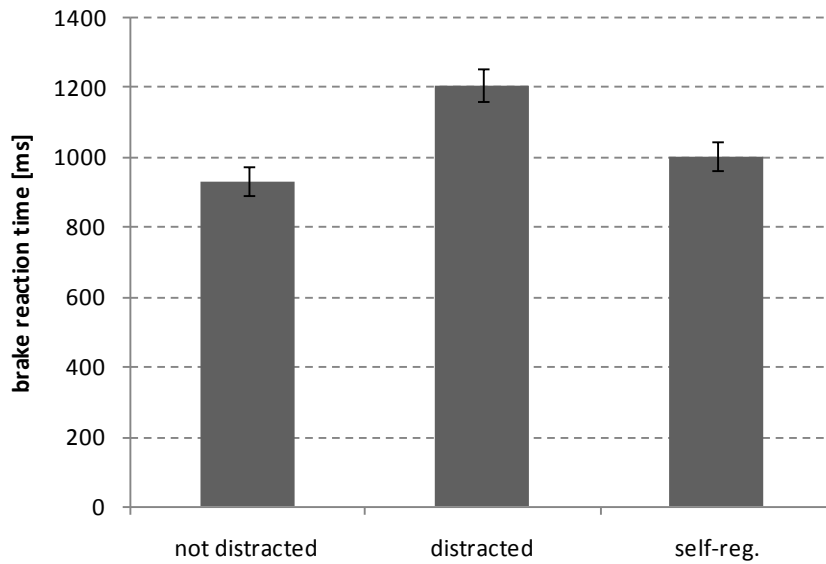

Fig. A3: Braking time in reaction to the pedestrian. Error bars represent the standard errors of the means.
